# Supplementary material
Source: PubMed Central journal article supplement (PMC9636065)

## **SUPPLEMENTAL METHODS**

### *Danish Health Registers*

The Danish Civil Registration System contains information regarding the sex, date of birth, vital status and emigration for all Danish citizens.<sup>1</sup> Linkage between the Danish Civil Registration System and the Danish National Patient Registry is accomplished via unique personal identification numbers that are assigned to all Danish citizens at the time of birth or immigration. The Danish National Patient Registry captures all inpatient encounters from January 1, 1977 and all outpatient encounters dating from January 1, 1995.<sup>2</sup> The Danish Prescription Registry was established in 1995 and includes data regarding all prescription therapies in Denmark.<sup>3</sup>

### *Patient Selection*

Patients with UC were defined based on previously published criteria utilizing International Classification of Diseases (ICD) coding (ICD-8: 536.19, 569.04; ICD-10: K51),<sup>4</sup> where patients were required to have at least 2 registrations or a single contact lasting 7 days or more. All patients undergoing proctocolectomy with IPAA for UC were identified using Current Procedural Terminology (CPT)/The Nordic Medico-Statistical Committee Classification of Surgical Procedures (NCSP, Supplemental Table 1). In each of these coding strategies, the index date for the study was defined as the 30 days after the final stage of surgery (to avoid misclassification of the outcome). This index date was identified using a CPT/NCSP code for an IPAA or a CPT/NCSP code for an ileostomy takedown following a CPT/NCSP code for a total abdominal colectomy or total proctocolectomy (with or without IPAA). Most patients undergo proctocolectomy and ileal pouch-anal anastomosis (IPAA) in a staged approach. To ensure that

we were capturing the index date at the latest stage of IPAA surgery, we employed the following approach. The “final stage” of surgery was defined as the last CPT/NCSP code for a pouch surgery, the fourth pouch surgery/pouch-related procedure, or two years after first pouch surgery, whichever came first. Follow-up began 30 days after the “final stage” of surgery to avoid misclassification of the outcome.

Of note, in using this definition, the index date is conditioned on occurring within up to 2 years of follow up from the first stage of IPAA. We have estimated the probability of loss to follow-up within 2 years (by either death or emigration) to be 2.2% (1.7% - 3.1%), and we have estimated the probability of having a second stage of IPAA within 2 years of the first stage of IPAA to be 86.6% (84.9% - 88.2%). Using this approach, the error we introduce by conditioning on the future is smaller than the error present if using first stage of the IPAA as index date for all patients.

### *Secondary Outcomes*

There are no NCSP codes that correspond with the CPT code for pouchoscopy used in prior evaluations of administrative claims (44385, 44386). Given this limitation, we evaluated the use of any lower endoscopic procedure in the post-IPAA period (Supplemental Table 1) as a proxy for pouchoscopy, comparing the use of these procedures over time and between patients with pouchitis and those without pouchitis in the first 2 years after IPAA.

**SUPPLEMENTAL REFERENCES**

1. Pedersen CB. The Danish Civil Registration System. *Scand J Public Health* 2011;39:22-5.
2. Schmidt M, Schmidt SA, Sandegaard JL, et al. The Danish National Patient Registry: a review of content, data quality, and research potential. *Clin Epidemiol* 2015;7:449-90.
3. Pottegård A, Schmidt SAJ, Wallach-Kildemoes H, et al. Data Resource Profile: The Danish National Prescription Registry. *Int J Epidemiol* 2017;46:798-798f.
4. Singh S, Andersen NN, Andersson M, et al. Comparison of Infliximab and Adalimumab in Biologic-Naive Patients With Ulcerative Colitis: A Nationwide Danish Cohort Study. *Clin Gastroenterol Hepatol* 2017;15:1218-1225 e7.

Supplemental Table 1. Current Procedural Terminology and Danish Sundhedsvæsenets Klassifikations System coding for procedures related to ileal pouch-anal anastomosis

| CPT code | Definition                                                                                                                                                                                              | NCSP Code                                                          |
|----------|---------------------------------------------------------------------------------------------------------------------------------------------------------------------------------------------------------|--------------------------------------------------------------------|
| 44153    | Legacy code, colectomy without proctectomy                                                                                                                                                              |                                                                    |
| 44157    | Colectomy, total, abdominal, with proctectomy; with ileoanal anastomosis, includes loop ileostomy, and rectal mucosectomy, when performed                                                               | (K) JFH 30<br>(K) JFH 33                                           |
| 44158    | Colectomy, total, abdominal, with proctectomy; with ileoanal anastomosis, creation of ileal reservoir (S or J), includes loop ileostomy, and rectal mucosectomy, when performed                         |                                                                    |
| 44211    | Laparoscopy, surgical; colectomy, total, abdominal, with proctectomy, with ileoanal anastomosis, creation of ileal reservoir (S or J), with loop ileostomy, includes rectal mucosectomy, when performed | (K) JFH 31<br>(K) JFH 34                                           |
| 44227    | Laparoscopy, surgical, closure of enterostomy, large or small intestine, with resection and anastomosis                                                                                                 |                                                                    |
| 44620    | Closure of enterostomy, large or small intestine                                                                                                                                                        | (K) JFG 00<br>(K)JFG00A<br>(K) JFG 10<br>(K) JFG 10A               |
| 44625    | Closure of enterostomy, large or small intestine; with resection and anastomosis other than colorectal                                                                                                  | (K) JFG 20<br>(K) JFG 20A                                          |
| 44626    | Closure of enterostomy, large or small intestine; with resection and colorectal anastomosis (eg, closure of Hartmann type procedure)                                                                    | (K) JFG 23<br>(K) JFG 26<br>(K) JFG 29<br>(K) JFG 30<br>(K) JFG 33 |
| 45113    | Proctectomy, partial, with rectal mucosectomy, ileoanal anastomosis, creation of ileal reservoir (S or J), with or without loop ileostomy                                                               | (K) JGB 50<br>(K) JGB 60<br>(K) JGB 61                             |
| 44385    | Pouchoscopy                                                                                                                                                                                             |                                                                    |
|          | Colonoscopy                                                                                                                                                                                             | (K) UJF 32                                                         |
|          | Colonoscopy with biopsy                                                                                                                                                                                 | (K) UJF 35                                                         |
|          | Flexible sigmoidoscopy                                                                                                                                                                                  | (K) UJF 42                                                         |
|          | Flexible sigmoidoscopy with biopsy                                                                                                                                                                      | (K) UJF 45                                                         |
|          | Peranal enteroscopy                                                                                                                                                                                     | (K) UJF 82                                                         |
|          | Peranal enteroscopy with biopsy                                                                                                                                                                         | (K) UJF 85                                                         |
| 44386    | Pouchoscopy with biopsy                                                                                                                                                                                 |                                                                    |
| 46712    | IPAA revision via the combined abdominoperineal approach                                                                                                                                                | (K) JFG 53                                                         |
| 45136    | IPAA excision                                                                                                                                                                                           | (K) JFG 73                                                         |

Current Procedural Terminology (CPT); The Nordic Medico-Statistical Committee Classification of Surgical Procedures (NCSP)

Supplemental Table 2. Specific coding utilized in the identification of patients treated with anti-tumor necrosis factor alpha therapy, corticosteroid therapy, and those patients experiencing an inflammatory bowel disease-related hospitalization

| <b>Exposure</b>                         | <b>Codes</b>                                                                                                                              |
|-----------------------------------------|-------------------------------------------------------------------------------------------------------------------------------------------|
| <b>IBD-related hospitalization</b>      | Inpatient contact (c_patttype=0) with A-diagnosis of ICD-10: DK50, DK51 or B-diagnosis of DK50, DK51 and A-diagnosis of one the following |
| Abdominal pain                          | ICD-10: DR100, DR101, DR102C, DR103                                                                                                       |
| Nausea and vomiting                     | ICD-10: DR11                                                                                                                              |
| Non-infectious gastroenteritis          | ICD-10: DK529+A-H (excl. DK529B1)                                                                                                         |
| Rectal- or anal bleeding                | ICD-10: DK625A+B                                                                                                                          |
| Fistula                                 | ICD-10: DK603-605, DK316E, DK632, DN822-825+DN828F                                                                                        |
| Abscess                                 | ICD-10: DK610-14, DK630, DK650A, DK650G, DK650H, DL023C                                                                                   |
| Stenosis                                | ICD-10: DK264A-E, DK566+F+G                                                                                                               |
| Ileus and sub-ileus                     | ICD-10: DK566C, DK567                                                                                                                     |
| <b>Corticosteroids</b>                  | ATC: H02AB                                                                                                                                |
| <b>Anti-Tumor Necrosis Factor-alpha</b> | ATC: L04AB , SKS: B0HJ18A                                                                                                                 |

Abbreviations: ATC Anatomic Therapeutic Classification, ICD-10 International Classification of Diseases version 10, NCSP The Nordic Medico-Statistical Committee Classification of Surgical Procedures, SKS Sundhedsvæsenets Klassifikations System (classification system used for documentation of clinical and administrative matters in the Danish health care system).

Supplemental Table 3. International Classification of Diseases coding for extraintestinal manifestations

| <b>Diagnostic Group</b>                  | <b>Diagnoses</b>                  | <b>ICD-8</b>                                              | <b>ICD-10</b> |
|------------------------------------------|-----------------------------------|-----------------------------------------------------------|---------------|
| <b>Arthritis/arthralgia</b>              | Psoriatic Arthritis               | 696.09                                                    | M07           |
|                                          | Rheumatoid Arthritis              | 712.00, 712.10, 712.19, 712.29, 712.38,<br>712.39, 712.59 | M05           |
|                                          | Ankylosing Spondylitis            | 712.49                                                    | M45           |
|                                          | Sacroiliitis                      | 726                                                       | M43.2         |
| <b>Osteoporosis</b>                      | Osteoporosis                      | 723                                                       | M80-M82       |
| <b>Primary Sclerosing Cholangitis</b>    | Primary Sclerosing Cholangitis    | 575                                                       | K83.0         |
| <b>Non-alcoholic Fatty Liver Disease</b> | Non-alcoholic Fatty Liver Disease | 573                                                       | K76.0         |
| <b>Dermatologic Manifestations</b>       | Erythema Nodosum                  | 695.2                                                     | L52           |
|                                          | Pyoderma Gangrenosum              | 686                                                       | L88           |
|                                          | Psoriasis                         | 696.09, 696.10, 696.19                                    | L40           |
| <b>Ocular Lesions</b>                    | Conjunctivitis                    | 360                                                       | H10           |
|                                          | Uveitis                           | 364                                                       | H20           |
|                                          | Episcleritis                      |                                                           | H15           |
| <b>Aphthous Stomatitis</b>               | Aphthous Stomatitis               | 528                                                       | K12.0         |
| <b>Thromboembolic Events</b>             | Pulmonary Embolism                | 450                                                       | J84           |
|                                          | Deep Venous Thrombosis            | 453                                                       | I82.4         |

Supplemental Table 4. Demographic characteristics of patients undergoing proctocolectomy with ileal pouch-anal anastomosis between 1996 and 2018, evaluated by time period of ileal pouch-anal anastomosis

|                                                                          | Year of surgery |       |           |       |           |       |           |       |           |       | All   |       |
|--------------------------------------------------------------------------|-----------------|-------|-----------|-------|-----------|-------|-----------|-------|-----------|-------|-------|-------|
|                                                                          | 1996-2000       |       | 2001-2005 |       | 2006-2010 |       | 2011-2014 |       | 2015-2018 |       |       |       |
|                                                                          | N               | %     | N         | %     | N         | %     | N         | %     | N         | %     | N     | %     |
| <b>All</b>                                                               | 320             | 100.0 | 381       | 100.0 | 431       | 100.0 | 353       | 100.0 | 179       | 100.0 | 1,664 | 100.0 |
| <b>Sex</b>                                                               |                 |       |           |       |           |       |           |       |           |       |       |       |
| <b>Female</b>                                                            | 145             | 45.3  | 180       | 47.2  | 206       | 47.8  | 166       | 47.0  | 71        | 39.7  | 768   | 46.2  |
| <b>Male</b>                                                              | 175             | 54.7  | 201       | 52.8  | 225       | 52.2  | 187       | 53.0  | 108       | 60.3  | 896   | 53.8  |
| <b>Age at surgery</b>                                                    |                 |       |           |       |           |       |           |       |           |       |       |       |
| <b>less than 35</b>                                                      | 193             | 60.3  | 200       | 52.5  | 192       | 44.5  | 166       | 47.0  | 96        | 53.6  | 847   | 50.9  |
| <b>35 or above</b>                                                       | 127             | 39.7  | 181       | 47.5  | 239       | 55.5  | 187       | 53.0  | 83        | 46.4  | 817   | 49.1  |
| <b>Duration of UC prior to colectomy<br/>(median, quartile range)</b>    | 2.0             | 4.7   | 2.2       | 5.2   | 2.4       | 6.6   | 2.5       | 8.0   | 1.7       | 6.1   | 2.2   | 6.1   |
| <b>Corticosteroid use in the year prior to<br/>IPAA</b>                  | 141             | 44.1  | 169       | 44.4  | 151       | 35.0  | 113       | 32.0  | 49        | 27.4  | 623   | 37.4  |
| <b>IBD-related hospitalization in the year<br/>prior to IPAA</b>         | 289             | 90.3  | 322       | 84.5  | 316       | 73.3  | 220       | 62.3  | 101       | 56.4  | 1,248 | 75.0  |
| <b>Extraintestinal manifestations<br/>(in the 5 years prior to IPAA)</b> | 24              | 7.5   | 38        | 10.0  | 31        | 7.2   | 37        | 10.5  | 29        | 16.2  | 159   | 9.6   |

Ileal pouch-anal anastomosis (IPAA), ulcerative colitis (UC)

Supplemental Table 5. Percentage of patients with a diagnosis of Crohn's disease within the first two years after ileal pouch-anal anastomosis, overall and evaluated by time period of index surgery

|                  | <b>Cumulative Incidence of CD in the<br/>First 2 Years after IPAA</b> | <b>95% CI</b> |
|------------------|-----------------------------------------------------------------------|---------------|
| <b>Overall</b>   | 7.4%                                                                  | (6.2%-8.7%)   |
| <b>1996-2000</b> | 7.6%                                                                  | (5.1%-11.1%)  |
| <b>2001-2005</b> | 8.2%                                                                  | (5.9%-11.5%)  |
| <b>2006-2010</b> | 8.0%                                                                  | (5.8%-11.0%)  |
| <b>2011-2014</b> | 4.9%                                                                  | (3.1%-7.7%)   |
| <b>2015-2018</b> | 8.4%                                                                  | (5.2%-13.6%)  |



Supplemental Table 6. Percentage of patients undergoing lower endoscopic procedures during the first two years after ileal-pouch anal anastomosis, evaluated by time period of index surgery

|                  | <b>Proportion of Patients</b> | <b>(95% CI)</b> |
|------------------|-------------------------------|-----------------|
| <b>1996-2000</b> | 17.4%                         | 13.6%-22.0%     |
| <b>2001-2005</b> | 30.7%                         | 26.3%-35.6%     |
| <b>2006-2010</b> | 44.6%                         | 40.0%-49.5%     |
| <b>2011-2014</b> | 48.1%                         | 42.9%-53.4%     |
| <b>2015-2018</b> | 62.3%                         | 55.2%-69.4%     |

Supplemental Table 7. Development of pouchitis within the first two years after ileal pouch-anal anastomosis, evaluated by time period of index surgery and stratified by age at the time of surgery

|                                  | <b>Adjusted HR<br/>(95% CI)</b> |
|----------------------------------|---------------------------------|
| <b>Patients Age 18-34</b>        |                                 |
| <b>1996-2000</b>                 | Reference                       |
| <b>2001-2005</b>                 | 1.10 (0.81 – 1.50)              |
| <b>2006-2010</b>                 | 1.42 (1.06 – 1.92)              |
| <b>2011-2014</b>                 | 1.61 (1.19 – 2.19)              |
| <b>2015-2018</b>                 | 1.81 (1.27 – 2.56)              |
| <b>Patients Age 35 and above</b> |                                 |
| <b>1996-2000</b>                 | Reference                       |
| <b>2001-2005</b>                 | 0.98 (0.68 – 1.42)              |
| <b>2006-2010</b>                 | 1.25 (0.89 – 1.77)              |
| <b>2011-2014</b>                 | 1.23 (0.87 – 1.77)              |
| <b>2015-2018</b>                 | 1.32 (0.86 – 2.01)              |

\*Adjusted for sex, year of surgery, age and socioeconomic index

Supplemental Table 8. Comparison of criteria used to diagnose pouchitis, evaluated by time period

|                    | <b>Diagnosis method</b> |          |                                  |          |
|--------------------|-------------------------|----------|----------------------------------|----------|
|                    | <b>ICD-10 code</b>      |          | <b>Antibiotic Use (ATC code)</b> |          |
|                    | <b>N</b>                | <b>%</b> | <b>N</b>                         | <b>%</b> |
| <b>All</b>         | 500                     | 63.7     | 285                              | 36.3     |
| <b>Time Period</b> |                         |          |                                  |          |
| <b>1996-2000</b>   | 86                      | 67.2     | 42                               | 32.8     |
| <b>2001-2005</b>   | 98                      | 59.8     | 66                               | 40.2     |
| <b>2006-2010</b>   | 135                     | 64.0     | 76                               | 36.0     |
| <b>2011-2014</b>   | 110                     | 59.8     | 74                               | 40.2     |
| <b>2015-2016</b>   | 71                      | 72.4     | 27                               | 27.6     |

Anatomic Therapeutic Classification (ATC), International Classification of Diseases (ICD)

Supplemental Table 9. Evaluation of the impact of clinical factors on the risk of pouchitis within the first two years after ileal pouch-anal anastomosis for ulcerative colitis

|                                                                              | <b>Adjusted HR*</b><br><b>(95% CI)</b> |
|------------------------------------------------------------------------------|----------------------------------------|
| <b>IBD-related hospitalization in the year prior to IPAA</b>                 | 1.16 (0.97 – 1.39)                     |
| <b>Corticosteroid use in the year prior to IPAA</b>                          | 1.01 (0.87 – 1.18)                     |
| <b>Extraintestinal manifestations diagnosed in the 5 years prior to IPAA</b> | 1.40 (1.11 – 1.74)                     |

\*Adjusted for sex, year of surgery, age, socioeconomic index

Supplemental Figure 1. Cumulative incidence of pouchitis among all patients undergoing ileal pouch-anal anastomosis, analyzed over years of available follow-up

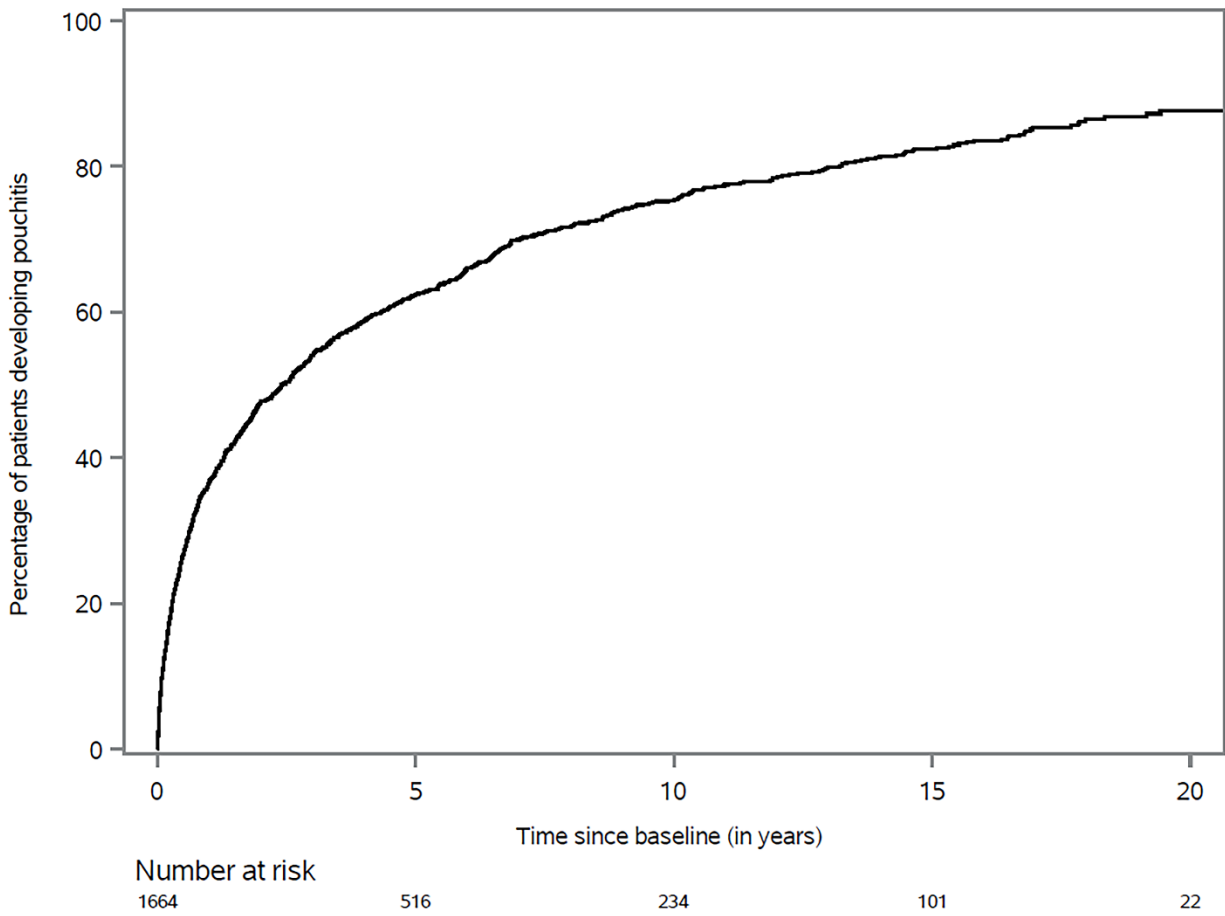

Supplement: NIHMS1804349-supplement-1.pdf [file NIHMS1804349-supplement-1.pdf]
